# Supplementary material for: Carbon-coated nickel phosphide with enriched surface Niδ+ sites enables an exceptionally high productivity of 2-methylfuran from biomass upgrading
Source: Royal Society of Chemistry journal article supplement (doi:10.1039/d3cy01609a), 2024-01-01
Supplement: d3cy01609a1.pdf [file d3cy01609a1.pdf]

## Supporting Information

### Carbon-coated nickel phosphide with enriched surface Ni<sup>δ+</sup> sites enables an exceptional high productivity of 2-methyl furan from biomass upgrading

Xu Yang<sup>a,b,\*</sup>, Wu Liu<sup>a,b</sup>, Shuyi Su<sup>a,b</sup>, Jinfeng Li<sup>a</sup>, Xiaoyang Wang<sup>c,\*</sup>, Mengjie Lian<sup>d</sup>, Lei Miao<sup>c</sup>

<sup>a</sup> School of Chemical Engineering and Light Industry, Guangdong University of Technology, Guangzhou, 510006, P. R. China

<sup>b</sup> Jiayang Branch of Chemistry and Chemical Engineering, Guangdong Laboratory (Rongjiang Laboratory), Jiayang, 515200, P. R. China

<sup>c</sup> Guangxi Key Laboratory for Relativity Astrophysics, State Key Laboratory of Featured Metal Materials and Life-cycle Safety for Composite Structures, School of Physical Science and Technology, Guangxi University, Nanning, 530004, P. R. China

<sup>d</sup> Guangxi Key Laboratory of Information Material, School of Material Science and Engineering, Guilin University of Electronic Technology, Guilin 541004, China

---

\* Corresponding author, Prof. X Yang, [yangxu@gdut.edu.cn](mailto:yangxu@gdut.edu.cn)

\*Corresponding author. Tel/Fax: +86 020-39322231. E-mail address: [yangxu@gdut.edu.cn](mailto:yangxu@gdut.edu.cn) (X. Yang)

## 1. Experimental Section

**Preparation of pure nickel nanoparticles (Ni NPs):** Firstly, the Ni-MOFs were calcinated in the muffle oven at 500 °C in an air atmosphere for 4 h, and the resulting nickel oxide nanoparticles were denoted as NiO<sub>x</sub> NPs. Next, the NiO<sub>x</sub> NPs were reduced by hydrogen at 400 °C for 2 h, and cooled down to room temperature to obtain the pure nickel nanoparticles, Ni NPs.

**Preparation of pure nickel phosphide nanoparticles (Ni<sub>2</sub>P NPs):** The as-obtained NiO<sub>x</sub> NPs were phosphatized by gas-phosphidation as that of Ni<sub>2</sub>P@C. The NiO<sub>x</sub> NPs and NaH<sub>2</sub>PO<sub>2</sub> were separately loaded on two quartz boats and heated to 300 °C for 1 h in Ar with a heating rate of 2 °C min<sup>-1</sup>. After cooling to room temperature, the resulting products were washed with water and ethanol several times to remove the impurities and dried in a vacuum at 60 °C.

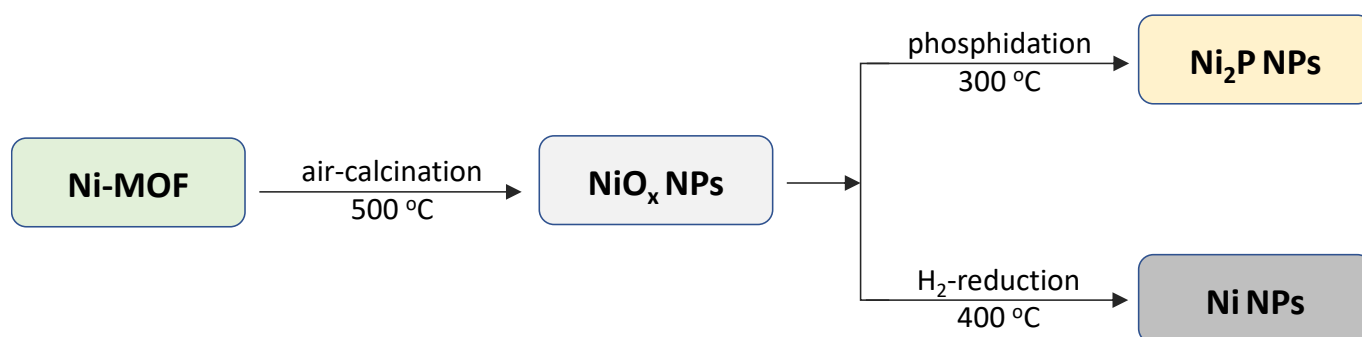

**Scheme S1** Preparation procedure of pure Ni NPs and Ni<sub>2</sub>P NPs without carbon coating.

## 2. Figures and Tables

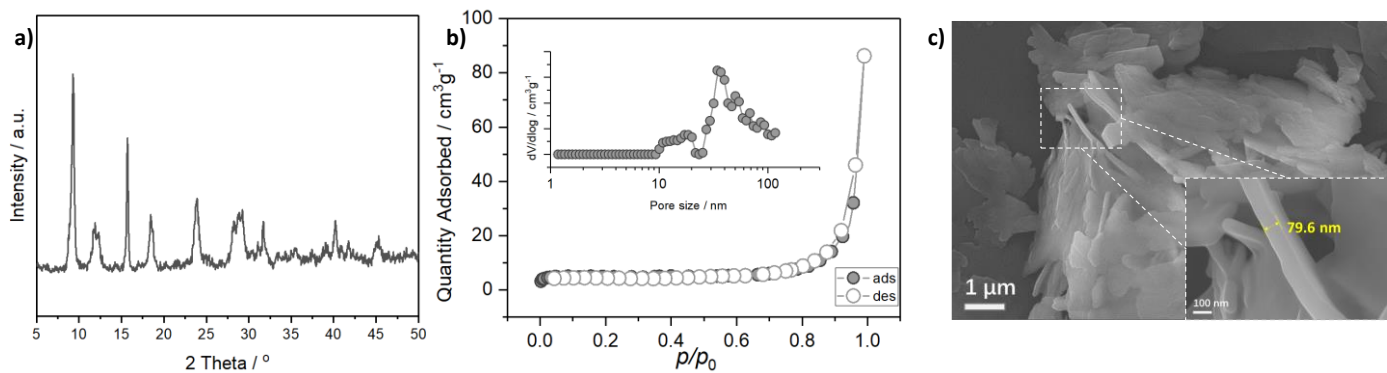

**Figure S1** (a) XRD pattern, (b) nitrogen sorption with pore size distribution plot (inset) and (c) SEM images of the as-obtained Ni-MOF-ref. The Ni-MOF-ref stands for the reference sample prepared using the same method as the Ni-MOF, but without the addition of PVP. The Ni-MOF-ref showed almost identical XRD, nitrogen sorption profiles and morphology as those of Ni-MOF, suggesting the negligible effect of added PVP on their crystalline, porosity and morphology.

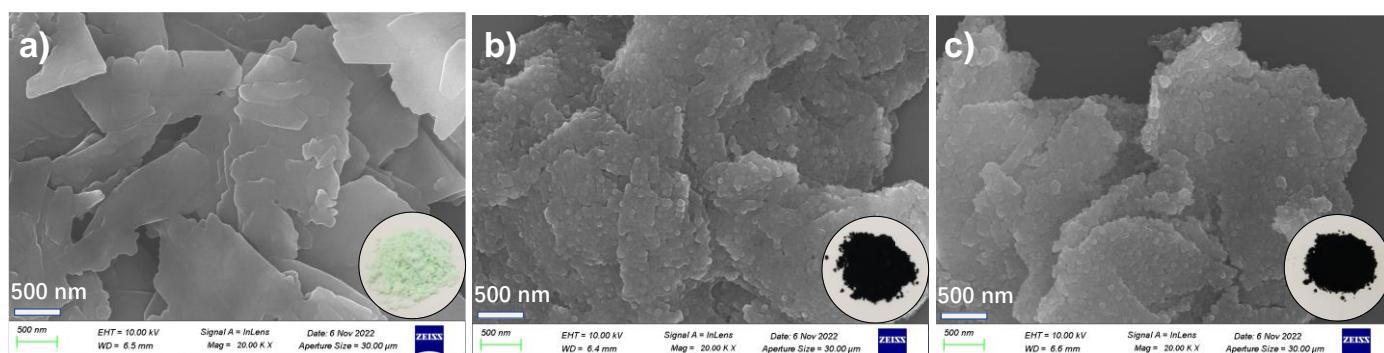

**Figure S2** SEM images of the as-obtained Ni-MOF, Ni@C, and Ni<sub>2</sub>P@C. Inset are their photographs of sample powder.

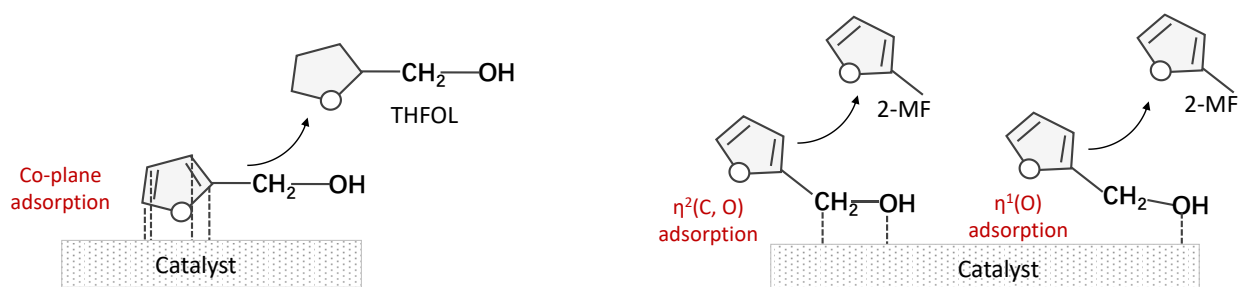

**Figure S3** Various adsorption models of FOL on the catalyst lead to different products<sup>1</sup>.

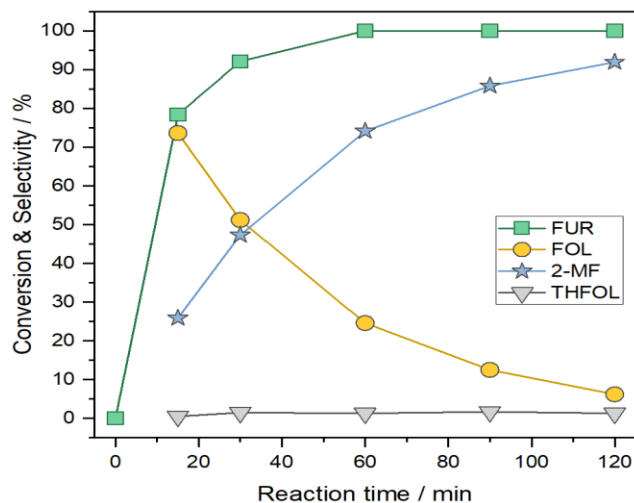

**Figure S4** Catalytic performance over the Ni<sub>2</sub>P@C using (e) FUR as substrate.

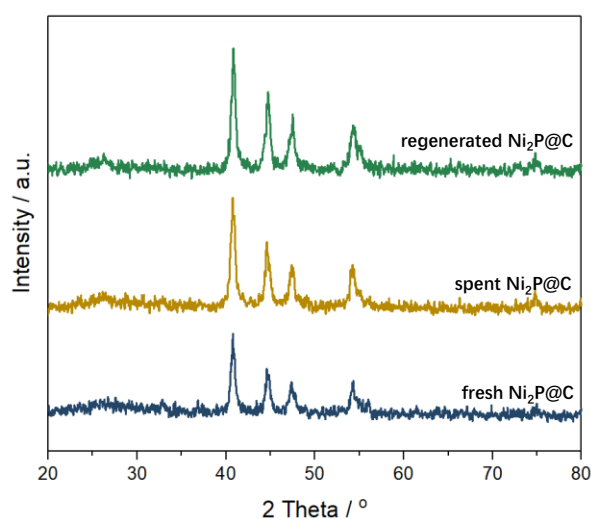

**Figure S5** XRD pattern of fresh, spent and regenerated Ni<sub>2</sub>P@C. Catalyst regeneration was calcinated in the nitrogen at 200 °C for 1 h.

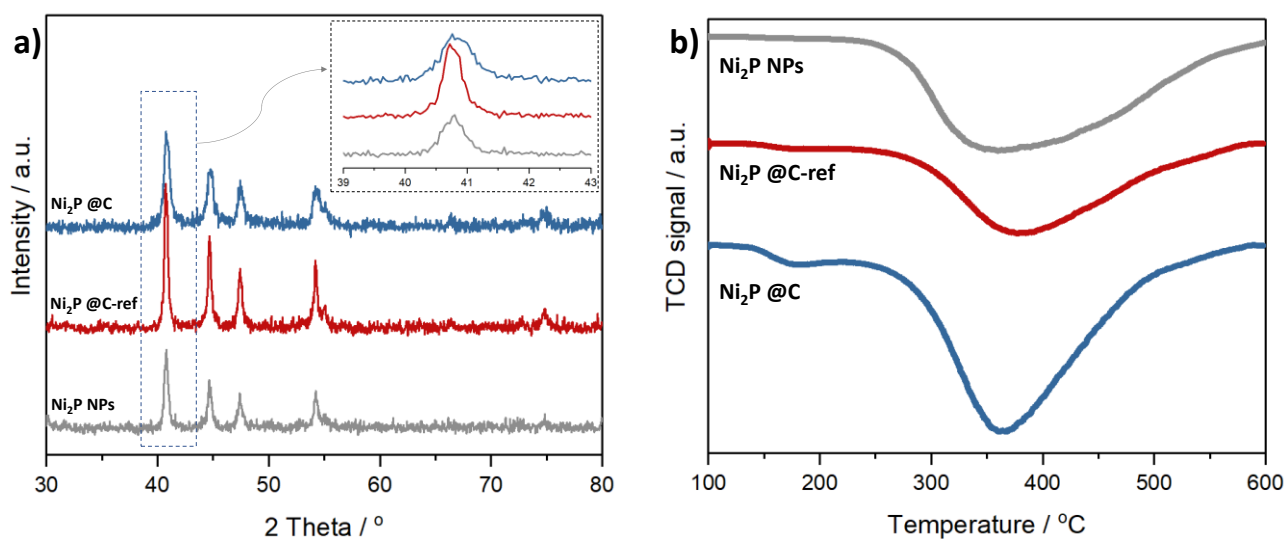

**Figure S6 (a)** XRD pattern of pure Ni<sub>2</sub>P nanoparticles, Ni<sub>2</sub>P@C and Ni<sub>2</sub>P@C-ref, and inset was the magnified

region to see the broadening peak. The Ni<sub>2</sub>P@C-ref refers to the sample prepared using the same procedure as the Ni<sub>2</sub>P@C but without the addition of PVP. The pure Ni<sub>2</sub>P nanoparticles (Ni<sub>2</sub>P NPs) were prepared by calcination and phosphidation of Ni-MOF. **(b)** H<sub>2</sub>-TPD profiles of various samples. These Ni<sub>2</sub>P-based catalysts show a prominent desorption peak at a high-temperature range (>300 °C), indicating their capacity for hydrogen spillover<sup>2,3</sup>.

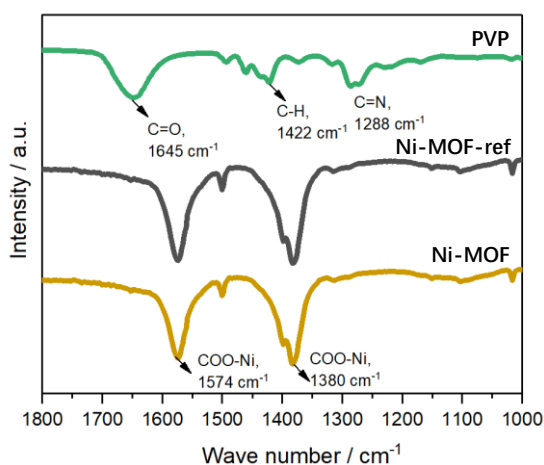

**Figure S7** FTIR spectra of various samples. Two prominent peaks centered at  $\sim 1574$  and  $\sim 1380$   $\text{cm}^{-1}$  are seen on the two nickel-based MOFs, corresponding to the asymmetric ( $\nu_{\text{as}}$ ) and symmetric ( $\nu_{\text{s}}$ ) stretching bands of the carboxylate group that coordinates with nickel<sup>4</sup>. Surprisingly, the characteristic peaks associated with the PVP, e.g.,  $1645$   $\text{cm}^{-1}$  of the C=O band,  $1288$ - $1268$   $\text{cm}^{-1}$  of the C-N band, etc., are conspicuously absent in the Ni-MOF spectrum, predicting the negligible presence of the PVP within the composite.

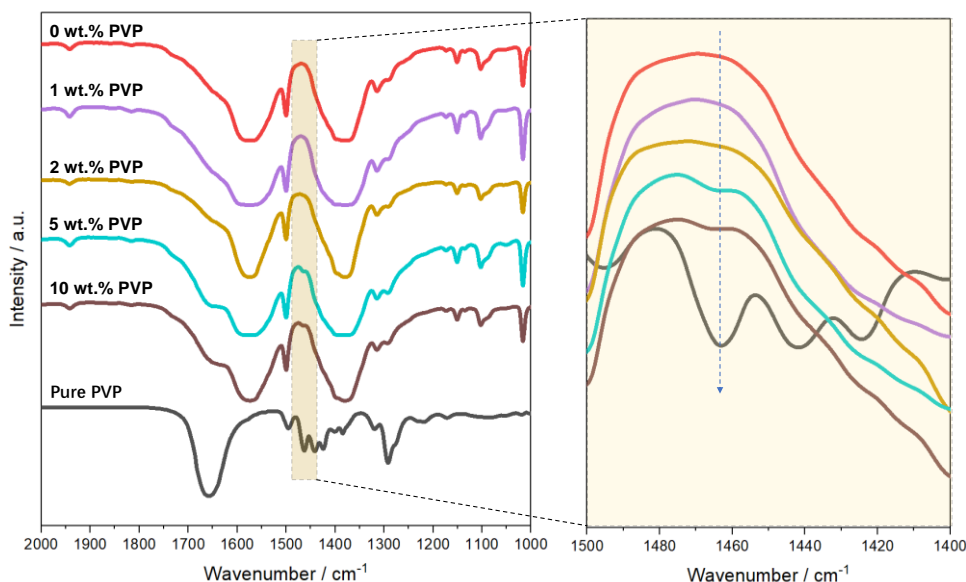

**Figure S8** FTIR spectra of as-synthesized Ni-MOF-ref physically blended with various content of PVP. To investigate the detection limit of FTIR toward PVP content in the Ni-MOF-ref, we performed the FTIR spectrum for the Ni-MOF-ref that was physically blended with various content (wt.%) of PVP. As expected, when the content of PVP was dropped to 1 wt.%, the band at  $1470\sim 1460\text{ cm}^{-1}$  associated with the vibration of C-H bond in PVP disappeared<sup>5</sup>. This result demonstrates that the FTIR technique cannot confirm the low content of PVP as 1 wt.% in the Ni-MOF-ref.

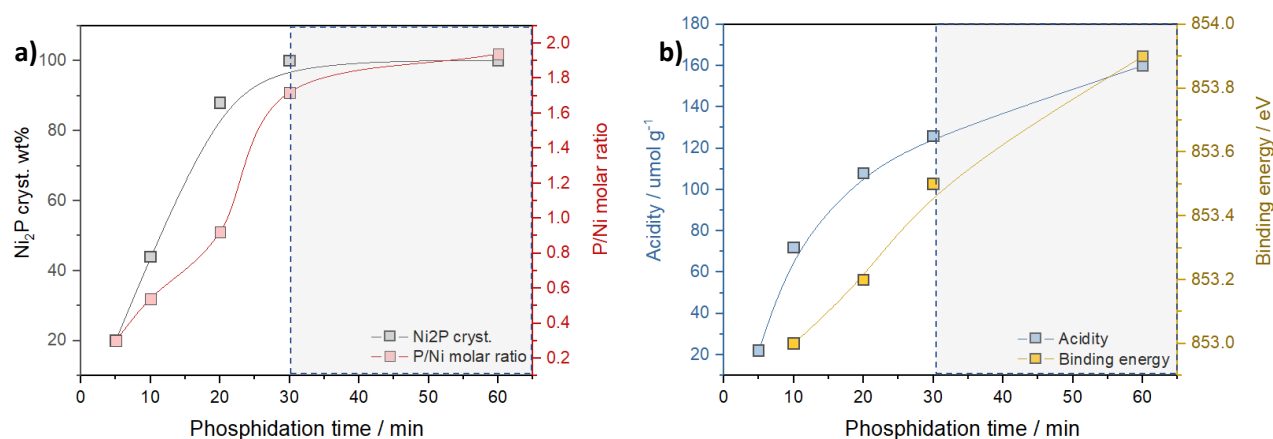

**Figure S9** Evolution of structure specifications on the Ni<sub>2</sub>P@C as a function of phosphidation time: (a) Ni<sub>2</sub>P crystallite percentage and the molar ratio of P/Ni, (b) acidity and binding energy of Ni 2p. **Figure 8a-b** depicts the evolution of various structural properties (such as P/Ni ratio, acidity, etc.) as a function of phosphidation time. In the initial 30 min, the metallic Ni undergoes almost complete transformation into the Ni<sub>2</sub>P phase. In accordance with this, the XPS-derived molar ratio of P/Ni increases linearly to  $\sim 1.7$  and gradually reaches its maximum value during the extended phosphidation period. Interestingly, the binding energy of Ni<sup>δ+</sup> continuously shifts towards higher values throughout the phosphidation process, accompanied by an increase in the acidity site capacity. These results elucidate that the initial formation of Ni<sub>2</sub>P raises a strong Ni-P synergy, resulting in charge transfer from the Ni to P. Continued phosphidation strengthens this synergy, rendering these Ni<sup>δ+</sup> species with more electron-deficiency and enhanced Lewis acidity. The decreased electron density of Ni<sup>δ+</sup> species, as disclosed by Weber's group [14], weakens the C=C interaction, thereby

promoting the  $\eta^2(\text{C}, \text{O})$  adsorption of the carbonyl group instead of the co-planar adsorption of the furan ring on the  $\text{Ni}^{\delta+}$  sites. As a result, hydrogenolysis of FOL into 2-MF, rather than hydrogenation of furan ring into THFOL, preferentially occurs on the  $\text{Ni}_2\text{P}@C$ .

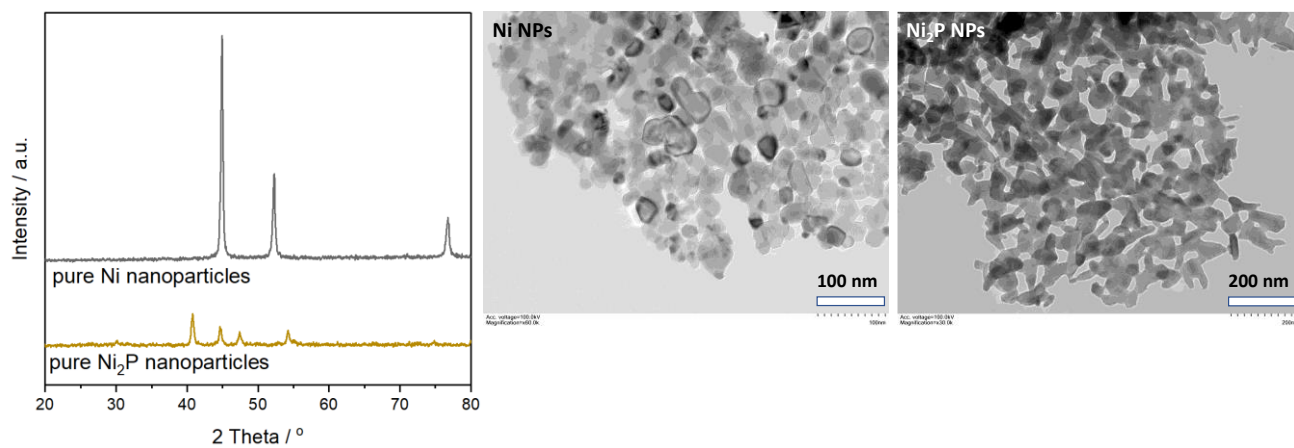

**Figure S10** Structure characterizations of pure nickel and nickel phosphide nanoparticles.

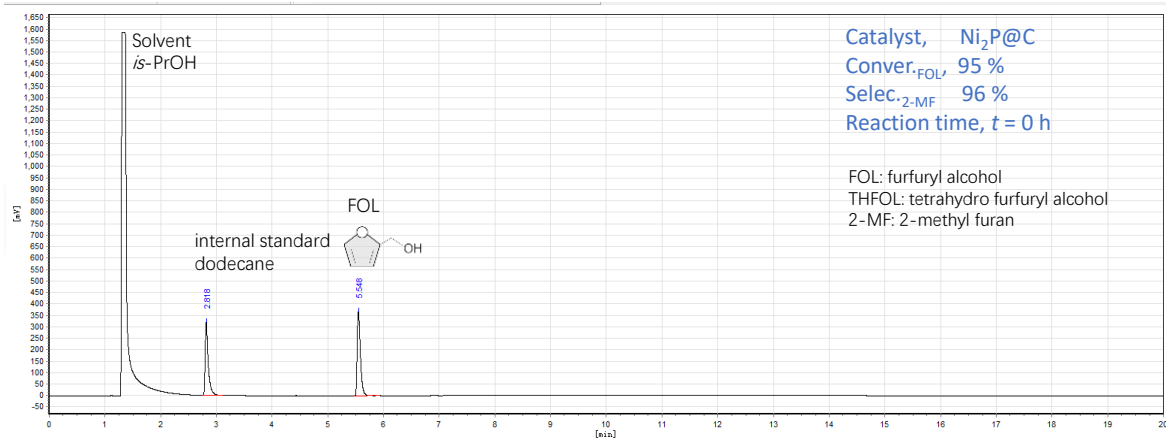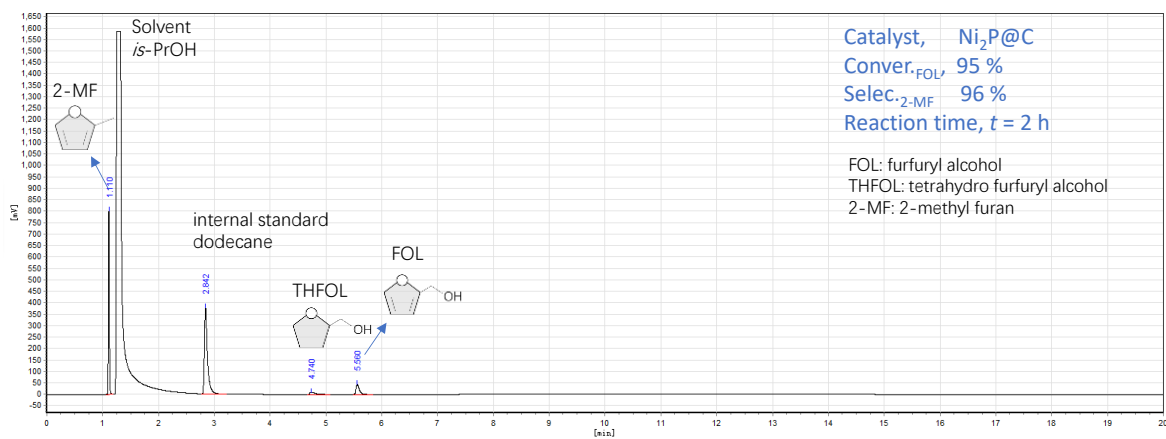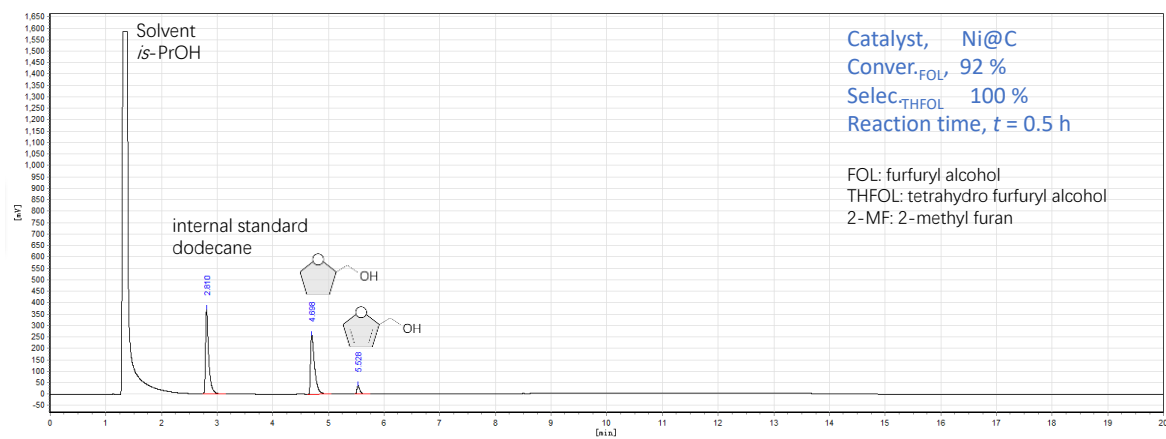

Figure S11 Representative gas chromatogram for several reaction runs.



**Table S1** HDO of FOL over various catalysts. Reaction: 0.2 g of FOL, 50 mg of catalyst, 10 ml of isopropanol as the solvent, 0.2 g of octane as the internal standard, reacted at 120 °C and 2 MPa for 2 h.

| Entry          | Catalyst                   | Conver. <sub>FOL</sub> / % | Selec. <sub>2-MF</sub> / % | Selec. <sub>THFOL</sub> / % |
|----------------|----------------------------|----------------------------|----------------------------|-----------------------------|
| 1              | none                       | < 0.1                      | n. a.                      | n. a.                       |
| 2              | Ni-MOF                     | < 0.1                      | n. a.                      | n. a.                       |
| 3 <sup>a</sup> | Ni@C-ref                   | 21                         | <1                         | >99                         |
| 4 <sup>a</sup> | Ni@C                       | >99                        | 1                          | 99                          |
| 5              | Ni <sub>2</sub> P@C-ref    | 49                         | 88                         | 12                          |
| 6              | Ni <sub>2</sub> P@C        | 92                         | 95                         | 5                           |
| 7 <sup>a</sup> | pure Ni NPs                | 9                          | <1                         | >99                         |
| 8              | pure Ni <sub>2</sub> P NPs | 60                         | 94                         | 6                           |

<sup>a</sup> 30 min of reaction period.

**Table S2** HDO of FUR/FOL to produce 2-MF over various non-noble metal catalysts reported in the literature.

| Catalyst                                                             | Temp. / °C | $p_{H_2}$ / Mpa | Time / h | Conver. / % | Selec. / % | Rate /<br>$g_{MF}g_{Cata}^{-1}\cdot h^{-1}$ | Refs      |
|----------------------------------------------------------------------|------------|-----------------|----------|-------------|------------|---------------------------------------------|-----------|
| NiMo IMC/Al <sub>2</sub> O <sub>3</sub>                              | 200        | 0.1             | 4        | 100         | 90         | 2.07                                        | 6         |
| Ni <sub>2</sub> P-1.00-300                                           | 240        | 1.5             | 4        | 100         | 91         | 1.32                                        | 7         |
| NiCuAl                                                               | 200        | 0.5             | 2        | 100         | 41         | 1.03                                        | 8         |
| Cu <sub>1</sub> Re <sub>0.14</sub> /γ-Al <sub>2</sub> O <sub>3</sub> | 200        | 2               | 6        | 100         | 86         | 0.72                                        | 9         |
| Ni <sub>2</sub> P_0.5                                                | 240        | 2               | 4        | 100         | 83         | 1.20                                        | 10        |
| 5/5% Cu/Ni                                                           | 230        | 4               | 2        | 96          | 61         | 1.70                                        | 11        |
| Ni <sub>1</sub> Zn <sub>3</sub> -MMO                                 | 200        | 3               | 6        | 100         | 95         | 0.92                                        | 12        |
| α-MoC                                                                | 150        | 3               | 6        | 96          | 90         | 1.12                                        | 13        |
| 10%Cu-                                                               | 200        | -               | -        | 100         | 84.5       | 0.63                                        | 14        |
| 10%Ni/TiO <sub>2</sub>                                               |            |                 |          |             |            |                                             |           |
| MoP/SiO <sub>2</sub>                                                 | 120        | 1               | -        | 100         | 96.3       | 0.25                                        | 15        |
| Co/CoAl <sub>2</sub> O <sub>4</sub>                                  | 150        | 1.5             | 5        | 100         | 97.2       | 1.66                                        | 16        |
| Co/SiO <sub>2</sub>                                                  | 180        | 1               | -        | 94.8        | 88.2       | 0.71                                        | 17        |
| Cu <sub>3</sub> -Mo <sub>1</sub> /CoO <sub>x</sub>                   | 180        | 2               | 4        | 99.9        | 92.04      | 0.64                                        | 18        |
| 20wt%Co-                                                             | 120        | 2.5             | 5        | 100         | 88.2       | 1.51                                        | 19        |
| CoO <sub>x</sub> /AC                                                 |            |                 |          |             |            |                                             |           |
| 5Cu3Re/Al <sub>2</sub> O <sub>3</sub>                                | 220        | -               | 4        | 100         | 94         | 1.00                                        | 20        |
| Ni <sub>2</sub> P@C                                                  | 120        | 2               | 2        | 92          | 95         | 1.7                                         | Thin work |
| Ni <sub>2</sub> P@C                                                  | 100        | 2               | 6        | 84          | 96         | 0.54                                        | This work |

**Table S3** HDO of FOL over various catalysts. Reaction: 0.2 g of FOL, 50 mg of catalyst, 10 ml solvent, 0.2 g of octane as the internal standard, reacted at 120 °C and 2 MPa of gaseous pressure for 2 h.

| Entry | Catalyst            | Solvent  | Gas charged            | Conver. <sub>FOL</sub> / % | Selec. <sub>2-MF</sub> / % | Selec. <sub>THFOL</sub> / % |
|-------|---------------------|----------|------------------------|----------------------------|----------------------------|-----------------------------|
| 1     | Ni <sub>2</sub> P@C | iso-PrOH | H <sub>2</sub> , 2 Mpa | 92                         | 94                         | 6                           |
| 2     | Ni <sub>2</sub> P@C | iso-PrOH | N <sub>2</sub> , 2 Mpa | 4                          | n. a.                      | n. a.                       |
| 3     | Ni <sub>2</sub> P@C | hexane   | H <sub>2</sub> , 2 Mpa | 44                         | 83                         | 31                          |

**Table S4** Structure specifications of Ni<sub>2</sub>P based catalysts with various particle size or phosphidation time.

| Catalyst                | <i>T</i> <sub>phosphi.</sub> / min | <sup>a</sup> <i>D</i> <sub>Cryst.</sub> / nm | <sup>b</sup> <i>S</i> <sub>metal</sub> / m <sup>2</sup> g <sup>-1</sup> | <sup>c</sup> <i>X</i> <sub>Ni<sup>δ+</sup></sub> / % | <sup>d</sup> <i>S</i> <sub>Ni<sup>δ+</sup></sub> / m <sup>2</sup> g <sup>-1</sup> |
|-------------------------|------------------------------------|----------------------------------------------|-------------------------------------------------------------------------|------------------------------------------------------|-----------------------------------------------------------------------------------|
| Ni <sub>2</sub> P NPs   | 60                                 | 21.6 (22.5)                                  | 44                                                                      | 46                                                   | 16                                                                                |
| Ni <sub>2</sub> P@C-ref | 60                                 | 28.5 (30.1)                                  | 33                                                                      | 48                                                   | 22                                                                                |
| Ni <sub>2</sub> P@C     | 60                                 | 13.2 (14.5)                                  | 72                                                                      | 45                                                   | 32                                                                                |
| Ni <sub>2</sub> P@C     | 30                                 | 13.2                                         | 72                                                                      | 38                                                   | 27                                                                                |
| Ni <sub>2</sub> P@C     | 20                                 | 13.1                                         | 72                                                                      | 25                                                   | 18                                                                                |
| Ni <sub>2</sub> P@C     | 10                                 | 13.2                                         | 72                                                                      | 14                                                   | 10                                                                                |

<sup>a</sup> Crystallite size (*D*<sub>Cryst.</sub>) was calculated using the Scherrer equation, and the corresponding values measured from the TEM images were given in the bracket; <sup>b</sup> Metal surface area (*S*<sub>metal</sub>) was measured using the equation,  $S = \frac{6000}{\rho \times d}$ , where the  $\rho$  is the density of Ni<sub>2</sub>P, 6.31 g cm<sup>-3</sup>, and *d* is the crystallite size of Ni<sub>2</sub>P calculated from the HRTEM images<sup>21</sup>; <sup>c</sup> percentage of surface Ni<sup>δ+</sup> species (*X*<sub>Ni<sup>δ+</sup></sub>) was determined from the XPS derived atomic ratio; <sup>d</sup> surface Ni<sup>δ+</sup> density (*S*<sub>Ni<sup>δ+</sup></sub>) was calculated using the equation,  $S_{Ni^{\delta+}} = S_{metal} \times X_{Ni^{\delta+}}$ .

## Reference

1. X. Lan, R. Pestman, E. J. M. Hensen and T. Weber, *Journal of Catalysis*, 2021, **403**, 181-193.
2. A. Infantes-Molina, E. Gralberg, J. A. Cecilia, E. Finocchio and E. Rodríguez-Castellón, *Catalysis Science & Technology*, 2015, **5**, 3403-3415.
3. S.-K. Wu, P.-C. Lai, Y.-C. Lin, H.-P. Wan, H.-T. Lee and Y.-H. Chang, *ACS Sustainable Chemistry & Engineering*, 2013, **1**, 349-358.
4. Z. Tong, X. Li, J. Dong, R. Gao, Q. Deng, J. Wang, Z. Zeng, J.-J. Zou and S. Deng, *ACS Catalysis*, 2021, **11**, 6406-6415.
5. A. Massoud, S. Challan and N. Maziad, *Journal of Macromolecular Science, Part A*, 2021, **58**, 408-418.
6. S. Fujita, K. Nakajima, J. Yamasaki, T. Mizugaki, K. Jitsukawa and T. Mitsudome, *ACS Catalysis*, 2020, **10**, 4261-4267.
7. Y. Wang, X. Feng, S. Yang, L. Xiao and W. Wu, *Journal of Nanoparticle Research*, 2020, **22**, 67.
8. M. Kalong, P. Hongmanorom, S. Ratchahat, W. Koo-amornpattana, K. Faungnawakij, S. Assabumrungrat, A. Srifa and S. Kawi, *Fuel Processing Technology*, 2021, **214**, 106721.
9. J. Chuseang, R. Nakwachara, M. Kalong, S. Ratchahat, W. Koo-amornpattana, W. Klysubun, P. Khemthong, K. Faungnawakij, S. Assabumrungrat, V. Itthibenchapong and A. Srifa, *Sustainable Energy & Fuels*, 2021, **5**, 1379-1393.
10. Y. Wang, F. Liu, H. Han, L. Xiao and W. Wu, *ChemistrySelect*, 2018, **3**, 7926-7933.
11. T. Varila, E. Mäkelä, R. Kupila, H. Romar, T. Hu, R. Karinen, R. L. Puurunen and U. Lassi, *Catalysis Today*, 2021, **367**, 16-27.
12. X. Meng, L. Wang, L. Chen, M. Xu, N. Liu, J. Zhang, Y. Yang and M. Wei, *Journal of Catalysis*, 2020, **392**, 69-79.
13. Y. Deng, R. Gao, L. Lin, T. Liu, X.-D. Wen, S. Wang and D. Ma, *Journal of the American Chemical Society*, 2018, **140**, 14481-14489.
14. A. Jaswal, P. P. Singh, A. K. Kar, T. Mondal and R. Srivastava, *Fuel Processing Technology*, 2023, **245**, 107726.
15. Y. Yao, S. Liu, Y. Wang, T. Li, Z. Sun, Y.-Y. Liu and A. Wang, *Industrial & Engineering Chemistry Research*, 2023, **62**, 17681-17690.
16. Y. Li, Q. Shen, Y. Nian, F. Wang, X. Zhang, Z. Zhang, C. Bing, X. Fan and R. Ahishakiye, *Applied Catalysis B: Environmental*, 2024, **343**, 123529.
17. P. Liu, L. Sun, X. Jia, C. Zhang, W. Zhang, Y. Song, H. Wang and C. Li, *Molecular Catalysis*, 2020, **490**, 110951.
18. Y. An, Q. Wu, L. Niu, C. Zhang, Q. Liu, G. Bian and G. Bai, *Journal of Catalysis*, 2024, **429**, 115271.
19. Z. Zhang, Z. Zhang, X. Zhang, F. Wang, Z. Wang, Y. Li, X. Wang, R. Ahishakiye and X. Zhang, *Applied Surface Science*, 2023, **612**, 155871.
20. K. Zhou, J. Chen, Y. Cheng, Z. Chen, S. Kang, Z. Cai, Y. Xu and J. Wei, *ACS Sustainable Chemistry & Engineering*, 2020, **8**, 16624-16636.
21. G. Bergeret and P. Gallezot, in *Handbook of Heterogeneous Catalysis*, 2008, DOI: <https://doi.org/10.1002/9783527610044.hetcat0038>, pp. 738-765.
